# Supplementary material for: Phylogenetic and evolutionary analyses of the VP4 gene of P[9] rotaviruses
Source: Research Square preprint supplement (doi:10.21203/rs.3.rs-43564/v2), 2020-10-21
Supplement: Supplementary file 1 [file 97395628516f32c8f81c3285.docx]

| No. of strains | Position of nucleotides | Length of nucleotide sequences |
| --- | --- | --- |
| 43 | 1–2328 | 2,328 |
| 51 | 16–2328 | 2,313 |
| 52 | 43–2328 | 2,286 |
| 54 | 43–911 | 869 |
| 57 | 43–879 | 837 |
| 59 | 43–864 | 822 |
| 66 | 43–861 | 819 |
| 67 | 43–858 | 816 |
| 73 | 43–852 | 810 |
| 75 | 43–843 | 801 |
| 81 | 43–741 | 699 |
| 94 | 187–741 | 555 |

Additional file 2. The number of rotavirus P[9] strains and the length of nucleotide sequences

used to construct 12 phylogenetic trees.
