# Supplementary material for: Phylogenetic and evolutionary analyses of the VP4 gene of P[9] rotaviruses
Source: Research Square preprint supplement (doi:10.21203/rs.3.rs-43564/v2), 2020-10-21
Supplement: Supplementary file 2 [file a6b74132e3f0fb319751c446.docx]

Additional file 1. Accession numbers of the 94 rotavirus P[9] outer capsid protein VP4 genes used for phylogenetic analysis throughout the experiment. The accession numbers were retrieved from the National Center for Biotechnology Information.

| Names of rotavirus strains | Accession number | Names of rotavirus strains | Accession number |
| --- | --- | --- | --- |
| AU-1 | D10970 | **R138** | KJ820894 |
| FRV-1 | D10971 | **R135** | KJ820883 |
| MP-CIVET66 | AB526248 | **R70** | KJ820872 |
| 02-92 | AB008289 | **RUS-Nov06-K10** | FJ435204 |
| E2451 | JX946171 | **CU-B1263/KK** | KT007763 |
| CAU14-1-262 | KR262152 | **CU-B1264/KK** | KT007764 |
| RAC-DG5 | AB526246 | **CMH120** | DQ923798 |
| L621 | EU708574 | **CMH134** | DQ923802 |
| CU365-KK | JN706511 | **KC814** | AJ311735 |
| 1259A | KJ412822 | **0537** | JF805012 |
| 1701SR | KJ412623 | **PA43** | JF793939 |
| 1256A | KJ412885 | **PA27-GV1** | JF793937 |
| 1702SR | KJ412909 | **Arg720** | EU513174 |
| 1257A | KJ412800 | **Kor588** | EU513177 |
| 1709SR | KJ412855 | **K12** | EU513176 |
| PAI58 | GU296427 | **CP1030** | AB125855 |
| Cat2a (AUS) | EU708959 | **CC425** | AJ311734 |
| Cat2b (JPN) | D13403 | **Hun7** | AJ488141 |
| Nov10-N507 | JQ289055 | **Hun8** | AJ488142 |
| O1154 | JX027618 | **Hun6** | AJ488140 |
| 17237 | JX271004 | **Hun2** | AJ488137 |
| RUS-Nov07-2253 | FJ435205 | **Hun3** | AJ488138 |
| O211 | JX435054 | **RV10109** | JQ715633 |
| O1180 | JX027619 | **R1320** | HM035520 |
| Omsk08-442 | GU320751 | **Hun1** | AJ480136 |
| CAU12-2-51 | KJ187602 | **M318** | AB008667 |
| KF17 | JF421978 | **O264** | AB008665 |
| BA222 | GU827409 | **PA151** | D14623 |
| 12US1134 | KF500522 | **Ro-6460** | X90736 |
| PAH136 | GU296426 | **AU125** | D14614 |
| ERN5162 | KJ919655 | **512B** | AB008669 |
| ME848 | KR632621 | **BG1465** | KM590395 |
| PE15776 | KF907295 | **BG11** | KM590385 |
| T152 | AB077766 | **BG1840** | KM590383 |
| PE18974 | KF907294 | **BG932** | KM590384 |
| 1471SR | KJ412578 | **BG885** | KM590391 |
| 942A | KJ412601 | **BG1328** | KM590386 |
| 1037A | KJ412534 | **BG1452** | KM590392 |
| 1135A | KJ412844 | **BG1511** | KM590388 |
| R49 | KJ820839 | **BG1458** | KM590393 |
| R55 | KJ820850 | **BG1506** | KM590397 |
| R142 | KJ820850 | **BG1461** | KM590394 |
| R47 | KJ820828 | **BG291** | KM590396 |
| R57  FRV317  PG05  N566 | KJ820861  LC328214.1  KC152916.1  MN029129.1 | **BG1271**  **FRV384**  **N235**  **Arg721** | KM590389  LC328215.1  MN029118.1  EU513175.1 |
